# Supplementary material
Source: PubMed Central journal article supplement (PMC10035468)
Supplement: crc-22-0255-s06.pdf [file crc-22-0255-s06.pdf]

Figure S5

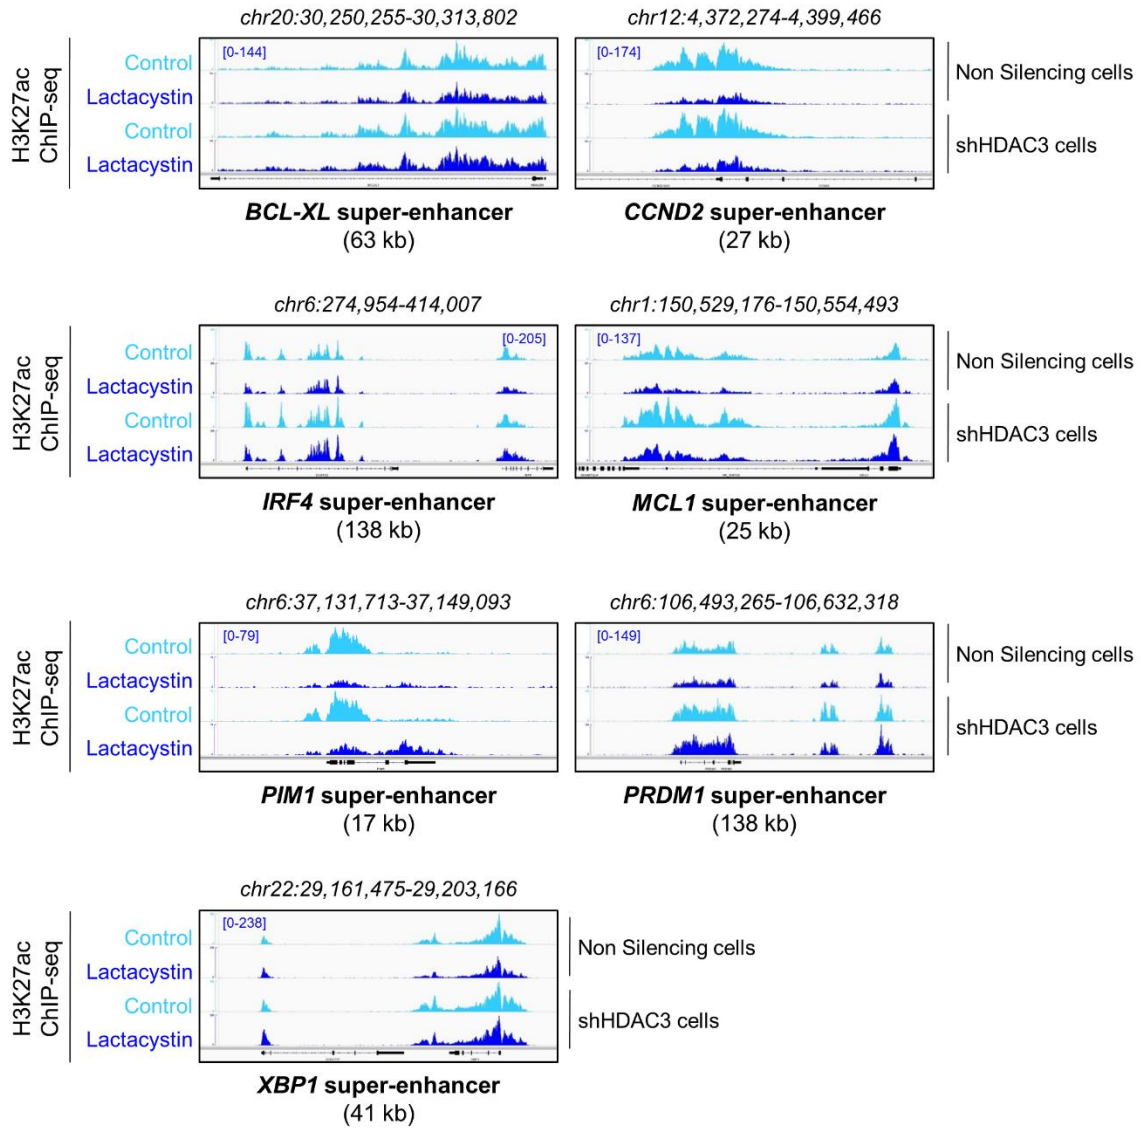

**Figure S5. HDAC3 mediates repression of the H3K27ac mark at super-enhancers of genes relevant for MM biology following proteasome inhibition.**

Gene tracks of H3K27ac ChIP-seq occupancy at super-enhancers in MM.1S-shHDAC3 knockdown cells following exposure to lactacystin. All IGV tracks are represented at the same scale (numbers in brackets at the y-axis). IGV snapshots are representative of two independent experiments. BCL-XL, B-cell lymphoma-extra large; CCND2, Cyclin D2; XBP1, X-box binding protein 1; IRF4, Interferon regulatory factor 4; MCL1, Myeloid cell leukemia sequence 1; PRDM1, PR/SET domain 1.
